# Supplementary material for: Granzyme B is correlated with clinical outcome after PD-1 blockade in patients with stage IV non-small-cell lung cancer
Source: PubMed Central journal article supplement — J Immunother Cancer. 2020 May 26;8(1):e000586. doi: 10.1136/jitc-2020-000586 (PMC7254154; doi:10.1136/jitc-2020-000586), 2020-05-26
Supplement: jitc-2020-000586supp001.pdf [file jitc-2020-000586supp001.pdf]

Supplementary data  
Supplementary Figure 1: Frequency histogram

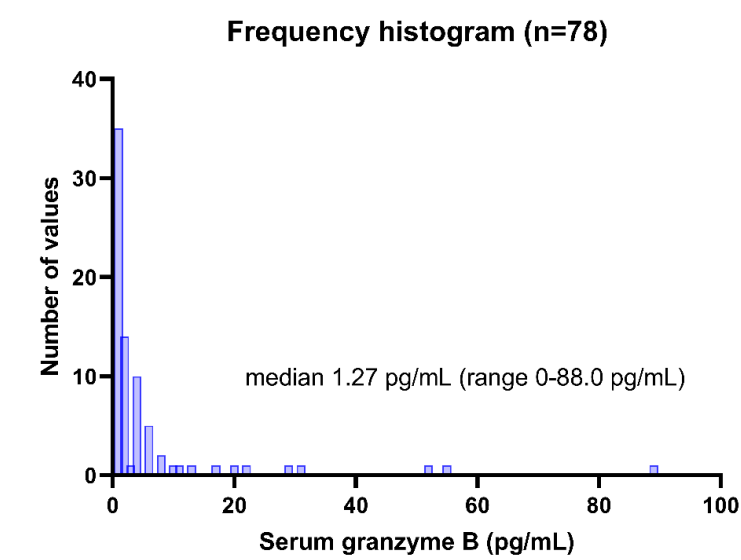

Suppl. figure 1: Frequency histogram of granzyme B measurements in serum. In total, baseline measurements were performed in 78 stage IV NSCLC patients. Almost half of the patients had undetectable levels of granzyme B in serum.

Supplementary Figure 2: Lack of association between serum granzyme B or GZMB genotypes and NK cell numbers

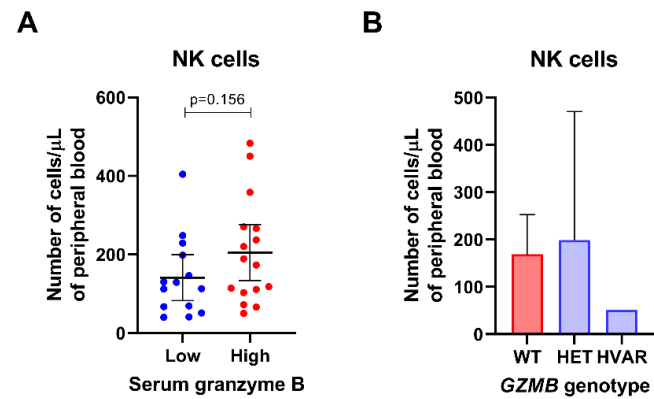

Suppl. figure 2: Association are shown between A) serum granzyme B levels or B) GZMB genotype and the number of CD56+ NK cells in blood. Abbreviations: wild type (WT), heterozygous variant (HET) and homozygous variant (HVAR).

Supplementary Figure 3: LD statistics for all common *GZMB* SNPs

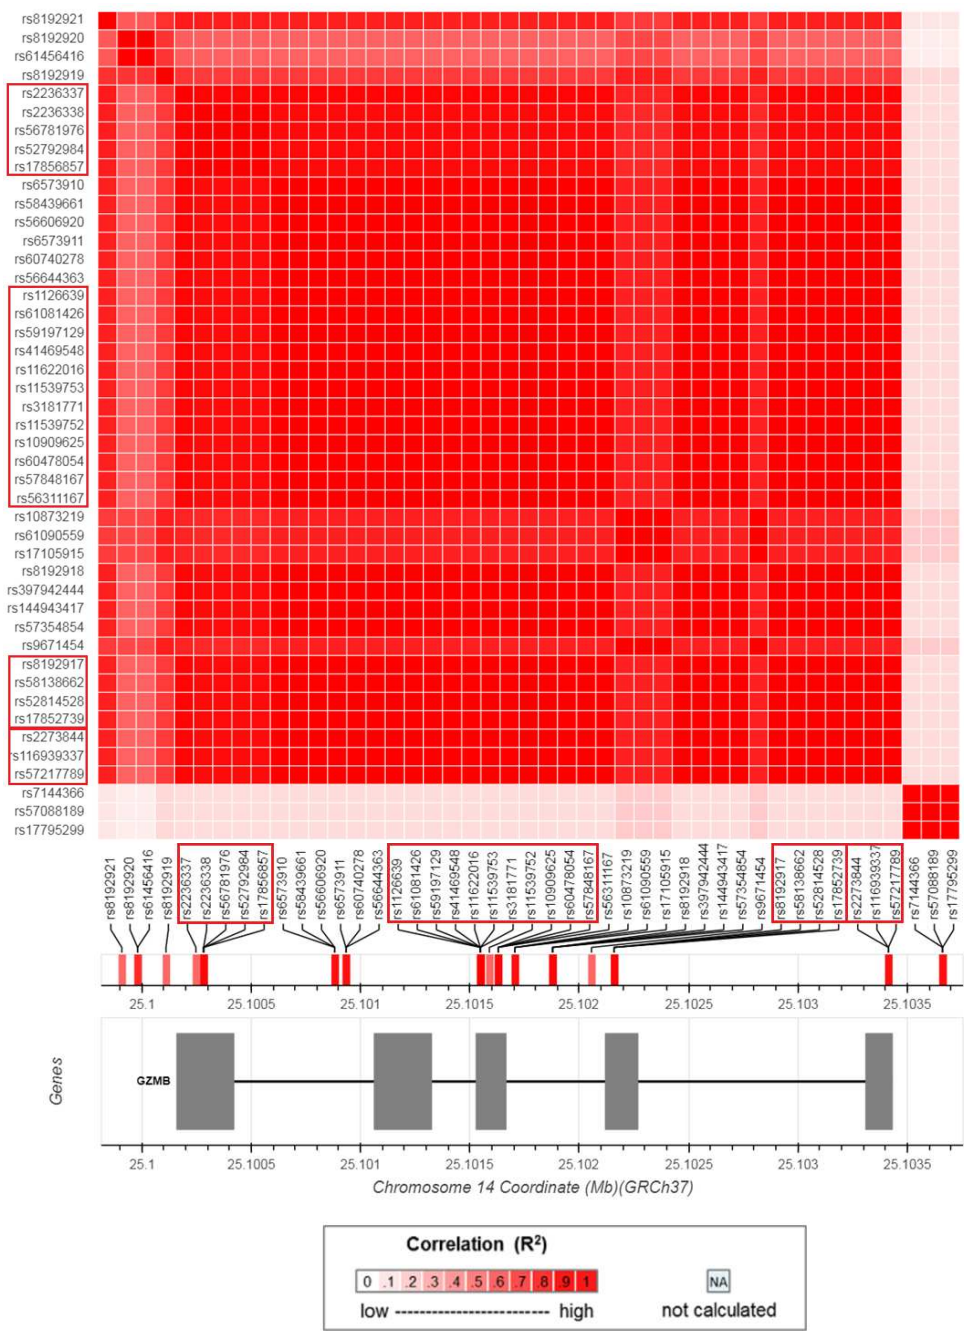

Suppl. figure 3: Heatmap matrix of pairwise linkage disequilibrium statistics of common SNPs of *GZMB* (MAF > 15%; dbSNP database). Exon germline variants (rs-numbers) are marked with the red boxes. Note that all common germline variants present in *GZMB* exons are in strong linkage disequilibrium, defining two predominant *GZMB* isoforms in the European population (~70% common *GZMB* allele). Data derived from publicly available reference haplotypes are used from the 1000 Genomes Project. The  $R$  squared as a measure of linkage disequilibrium are shown, red indicates high correlation. Abbreviations:  $R$  squared ( $R^2$ ).

**Supplementary table 1: Association of SNPs with AIDs**

| Gene          | Rs-number                        | Disease               | Effect                                                                                   | Key references                                            |
|---------------|----------------------------------|-----------------------|------------------------------------------------------------------------------------------|-----------------------------------------------------------|
| <i>HLA-A</i>  | rs60131261                       | Vitiligo              | Higher susceptibility (OR 1.53) for AID and associated with elevated expression of HLA-A | Jin, 2016 <sup>15</sup>                                   |
| <i>GZMB</i>   | rs8192917                        | Vitiligo              | Higher susceptibility (OR 1.23/1.39) for AID                                             | Jin, 2016 <sup>15</sup><br>Xu, 2018 <sup>16</sup>         |
| <i>IL10</i>   | rs3024493                        | SLE, T1D, CD, UC, BeD | Higher susceptibility (OR 1.26) for AIDs                                                 | Ramos, 2011 <sup>17</sup>                                 |
| <i>IL2RA</i>  | rs2104286                        | RA, MS                | Lower susceptibility (OR 0.81) for RA, lower susceptibility (OR 0.84) for MS             | Kurreeman, 2009 <sup>18</sup><br>Wang, 2018 <sup>19</sup> |
| <i>IFNG</i>   | rs2430561, rs2069705, rs2069718  | SLE                   | Higher susceptibility (OR 1.75/2.42) for AID                                             | Lee, 2016 <sup>20</sup><br>Kim, 2010 <sup>21</sup>        |
| <i>PDCD1</i>  | rs2227981, rs10204525, rs2227982 | AS                    | Higher susceptibility for AID                                                            | Chen, 2016 <sup>22</sup><br>Liu, 2011 <sup>23</sup>       |
| <i>PTPN11</i> | rs2301756                        | UC                    | Higher susceptibility (OR 1.81) for AID                                                  | Narumi, 2009 <sup>24</sup>                                |
| <i>ZAP70</i>  | rs13420683                       | CD                    | Lower susceptibility (OR 0.44) for AID                                                   | Bouzid, 2013 <sup>25</sup>                                |

*Suppl. table 1: Germline variations of genes that are implicated in the etiopathogenesis of autoimmune diseases (AIDs). These variants are indicated by gene and rs-number. Abbreviations: Type 1 diabetes (T1D), Crohn's disease (CD), ulcerative colitis (UC), ankylosing spondyloditis (AS), Behcet's disease (BeD), rheumatoid arthritis (RA), multiple sclerosis (MS), systemic lupus erythematosus (SLE).*

**Supplementary table 2: Investigated single-nucleotide polymorphisms**

| Protein       | Gene          | rs-number  | Variant      | WT  | HET | HVAR | Undet. | MAF  | HWE ( $\chi^2$ ) |
|---------------|---------------|------------|--------------|-----|-----|------|--------|------|------------------|
| Granzyme B    | <i>GZMB</i>   | rs8192917  | c.128T>C     | 205 | 104 | 13   | 0      | 20%  | <0.01            |
| HLA-A         | <i>HLA-A</i>  | rs60131261 | delTTTA      | 178 | 116 | 28   | 0      | 27%  | 2.05             |
| IL-10         | <i>IL10</i>   | rs3024493  | c.387+284C>A | 231 | 81  | 10   | 0      | 16%  | 0.77             |
| CD25          | <i>IL2RA</i>  | rs2104286  | c.64+5006T>C | 180 | 118 | 22   | 2      | 25%  | 0.2              |
| IFN- $\gamma$ | <i>IFNG</i>   | rs2430561  | c.874T>A     | 105 | 153 | 63   | 1      | 43%  | 0.29             |
|               |               | rs2069705  | -1616T>C     | 145 | 135 | 42   | 0      | 34%  | 1.4              |
|               |               | rs2069718  | 367-895C>T   | 112 | 148 | 60   | 2      | 42%  | 0.8              |
| PD-1          | <i>PDCD1</i>  | rs2227981  | 804C>T       | 94  | 154 | 73   | 1      | 47%  | 0.42             |
|               |               | rs10204525 | 889G>A       | 271 | 47  | 4    | 0      | 9%   | 1.39             |
|               |               | rs2227982  | 644C>T       | 320 | 2   | 0    | 0      | 0.3% | -                |
| SHP-2         | <i>PTPN11</i> | rs2301756  | 333-223A>G   | 259 | 60  | 3    | 0      | 10%  | 0.05             |
| ZAP-70        | <i>ZAP70</i>  | rs13420683 | -21-4127C>A  | 177 | 106 | 33   | 6      | 27%  | 7.42*            |

Suppl. table 2: Overview of investigated SNPs. \*If  $\chi^2 > 3.84$  ( $p$ -value < 0.05) then SNP is not consistent with HWE. ZAP70 -32-4127C>A (rs13420683) was not consistent with HWE ( $\chi^2$  7.42;  $p < 0.01$ ) but remained in the analysis after excluding the likelihood of a type I error. As PDCD1 644C>T (rs2227982) had a MAF of 0.3% (<5%) in the study cohort, it was excluded from further analyses. All other SNPs were considered suitable for analysis. Abbreviations: wild-type (WT), heterozygote variant (HET), homozygote variant (HVAR), minor allele frequency (MAF), Hardy-Weinberg equilibrium (HWE).

**Supplementary table 3: Internal validation**

| <b>Multivariate analysis (BOR)</b> |                   |                   |                |             |                             |
|------------------------------------|-------------------|-------------------|----------------|-------------|-----------------------------|
| <b>Factor</b>                      | <b>Comparison</b> | <b>OR (95%CI)</b> | <b>P-value</b> | <b>Bias</b> | <b>Bias-corrected 95%CI</b> |
| GZMB c.128T>C                      | CC + CT vs. TT    | 1.019-2.509       | 0.041          | 0.006       | 1.052-2.548                 |
| Primary tumor                      | Other vs. adeno   | 0.410-0.981       | 0.041          | -0.005      | 0.425-1.009                 |
| IL-10 c.387+284C>A                 | AA vs. AA +AC     | 0.010-5.420       | 0.367          | -0.128      | 0.033-0.908                 |
| Primary tumor                      | Other vs. adeno   | 0.398-0.946       | 0.027          | -0.006      | 0.405-0.979                 |
| ZAP70 -21-4127C>A                  | AA vs. CC+AC      | 0.236-1.019       | 0.056          | 0.005       | 0.246-1.014                 |
| Primary tumor                      | Other vs. adeno   | 0.395-0.953       | 0.030          | -0.006      | 0.398-0.987                 |
| <b>Multivariate analysis (PFS)</b> |                   |                   |                |             |                             |
| <b>Factor</b>                      | <b>Comparison</b> | <b>HR (95%CI)</b> | <b>P-value</b> | <b>Bias</b> | <b>Bias-corrected 95%CI</b> |
| GZMB c.128T>C                      | CC+CT vs. TT      | 1.022-1.867       | 0.036          | 0.003       | 1.027-1.879                 |
| WHO performance                    | 0 vs. $\geq 1$    | 0.418-0.898       | 0.012          | <-0.001     | 0.408-0.876                 |
| Sex                                | Male vs. female   | 0.943-1.771       | 0.111          | <0.001      | 0.943-1.780                 |

*Suppl. table 3: Bootstrap results of the association between SNPs and clinical outcome. Bias measure, bias-corrected 95%CI and p-value of the multivariate analysis are shown in the table for each factor. SNPs associated with BOR, PFS or OS ( $p < 0.1$ ; multivariate analysis) were included. Remaining SNPs and patient factors are not shown. \* Abbreviations: hazard ratio (HR), odds ratio (OR), 95% confidence interval (95%CI).*

Supplementary table 4: Association of PD-L1, TMB and serum granzyme B with PFS

| PFS                          |                       |    | Univariate |            |         | Multivariate |            |         |
|------------------------------|-----------------------|----|------------|------------|---------|--------------|------------|---------|
|                              |                       | n  | HR         | 95%CI      | p-value | HR           | 95%CI      | p-value |
| Expression of PD-L1 in tumor | <50 vs. ≥50%          | 26 | 4.30       | 0.93-19.77 | 0.06    | 4.04         | 0.36-45.31 | 0.26    |
| Tumor mutational burden      | <10 vs. ≥10 mut/Mb    | 22 | 7.31       | 1.54-34.67 | 0.01*   | 3.42         | 0.60-19.53 | 0.17    |
| Serum granzyme B             | <1.27 vs. ≥1.27 pg/mL | 26 | 2.34       | 0.93-5.93  | 0.07    | 1.53         | 0.52-4.51  | 0.44    |

Suppl. table 4: Univariate and multivariate analysis of the association between expression of PD-L1 in tumor, tumor mutational burden and serum granzyme B levels with progression-free survival (PFS). Biomarkers associated with PFS (p-value<0.1) were included in the multivariate analysis. COX regression analysis was performed on a subset of patients from cohort 1, of whom baseline parameters and clinical outcome was available. Significance is marked by \*. Abbreviations: hazard ratio (HR), 95% confidence interval (95%CI).

Supplementary table 5: Association of PD-L1, TMB and serum granzyme B with OS

| OS                           |                       |    | Univariate |            |         | Multivariate |            |         |
|------------------------------|-----------------------|----|------------|------------|---------|--------------|------------|---------|
|                              |                       | n  | HR         | 95%CI      | p-value | HR           | 95%CI      | p-value |
| Expression of PD-L1 in tumor | <50 vs. ≥50%          | 26 | 4.04       | 0.90-18.15 | 0.07    | 3.22         | 0.28-36.50 | 0.35    |
| Tumor mutational burden      | <10 vs. ≥10 mut/Mb    | 22 | 3.42       | 0.93-12.66 | 0.07    | 1.65         | 0.36-7.54  | 0.52    |
| Serum granzyme B             | <1.27 vs. ≥1.27 pg/mL | 26 | 2.95       | 1.09-7.93  | 0.03*   | 2.25         | 0.73-6.91  | 0.16    |

Suppl. table 5: Univariate and multivariate analysis of the association between expression of PD-L1 in tumor, tumor mutational burden and serum granzyme B levels with overall survival (OS). Biomarkers associated with OS (p-value<0.1) were included in the multivariate analysis. COX regression analysis was performed on a subset of patients from cohort 1, of whom baseline parameters and clinical outcome was available. Significance is marked by \*. Abbreviations: hazard ratio (HR), 95% confidence interval (95%CI).

**Supplementary table 6: Correlation matrix of PD-L1, TMB and granzyme B**

|                                |                     |                         |                                |
|--------------------------------|---------------------|-------------------------|--------------------------------|
| <b>Tumor mutational burden</b> | Pearson Correlation | 0,13                    |                                |
|                                | p-value (2-tailed)  | 0,56                    |                                |
|                                | n                   | 22                      |                                |
| <b>Granzyme B</b>              | Pearson Correlation | -0,20                   | -0,18                          |
|                                | p-value (2-tailed)  | 0,33                    | 0,42                           |
|                                | n                   | 26                      | 22                             |
|                                |                     | <b>PD-L1 expression</b> | <b>Tumor mutational burden</b> |

*Suppl. table 6: Correlation matrix showing the Pearson correlation test outcomes of tumor mutational burden, granzyme B levels and PD-L1 expression in tumor tissue obtained prior to start of PD-1 ICI in a subset of patients from cohort 1. Abbreviations: number of patients (n).*
